# Supplementary material
Source: MDPI journal article supplement (https://www.mdpi.com/2227-9717/12/5/961)
Supplement: s1 [file s1]

## Supporting Information

# Utilizing recycled expanded polystyrene plastics to stabilize metal-organic frameworks for heterogeneous catalysis

Ruizhi Yin <sup>1</sup>, Enxi Shen <sup>1</sup>, Chenjia Liang <sup>1</sup>, Dezhong Song <sup>1</sup>, Samir El Hankari <sup>2</sup>, Jia Huo <sup>1,3,\*</sup>

<sup>1</sup> College of Chemistry and Chemical Engineering, Hunan University, Changsha 410082, Hunan, China;

<sup>2</sup> Chemical and Biochemical Sciences, Green Process Engineering, Mohammed VI Polytechnic 6 University (UM6P), Ben Guerir 43150, Morocco

<sup>3</sup> Greater Bay Area Institute for Innovation, Hunan University, Guangzhou 511300, China

\*Correspondence: [jiahuo@hnu.edu.cn](mailto:jiahuo@hnu.edu.cn)

Pages: 5

Figures: 4

Tables: 0

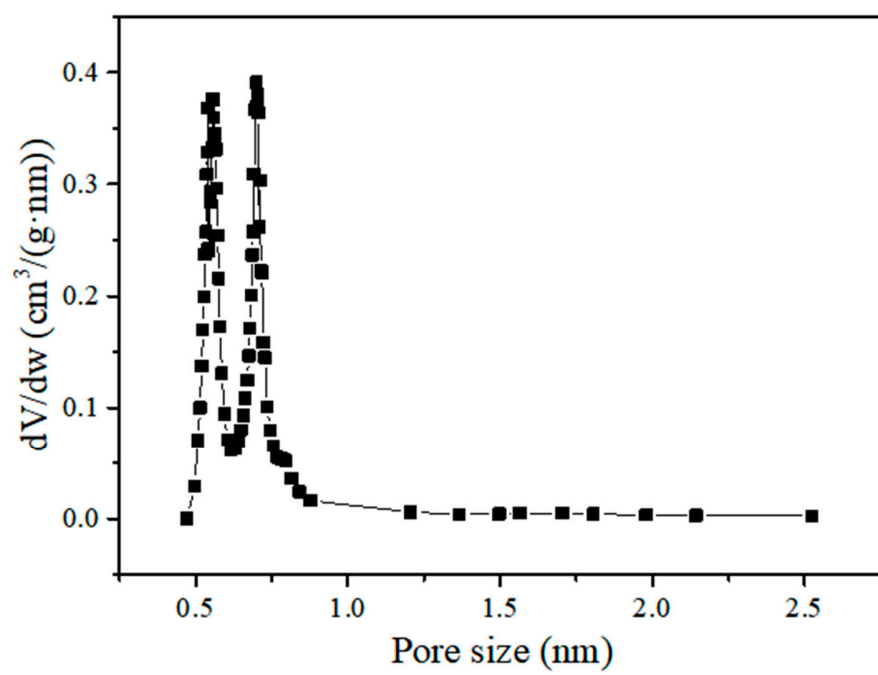

**Figure S1.** Pore size distribution of HKUST-1 nanoparticles

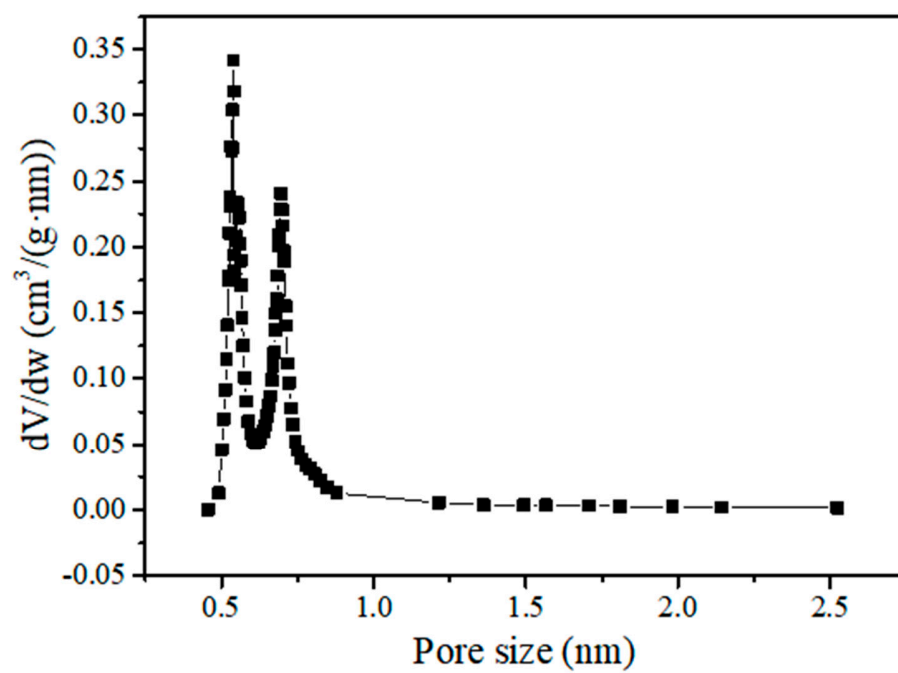

**Figure S2.** Pore size distribution of HKUST-1@EPP

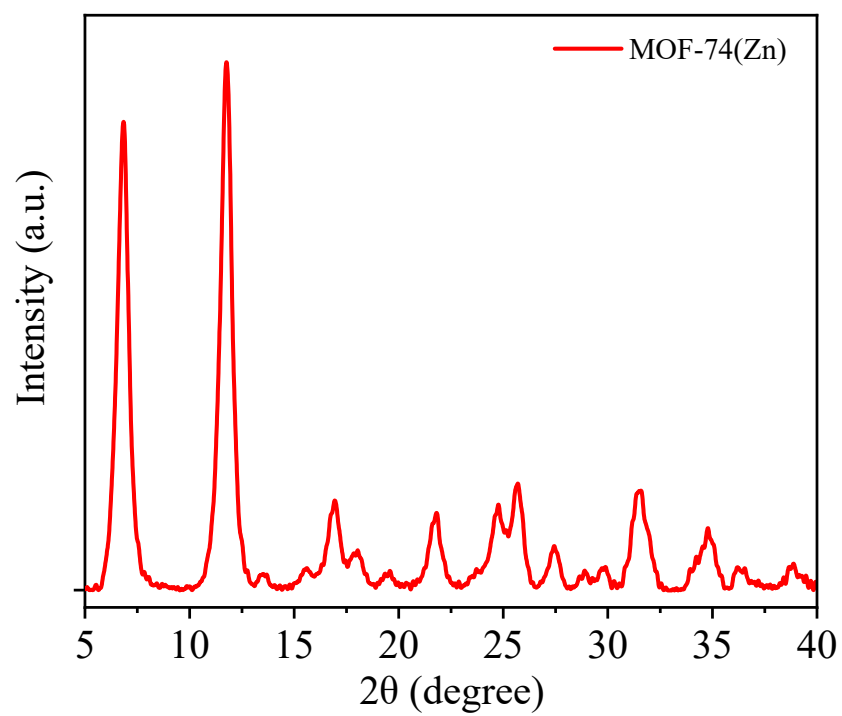

**Figure S3.** XRD pattern of MOF-74 (Zn) nanoparticles

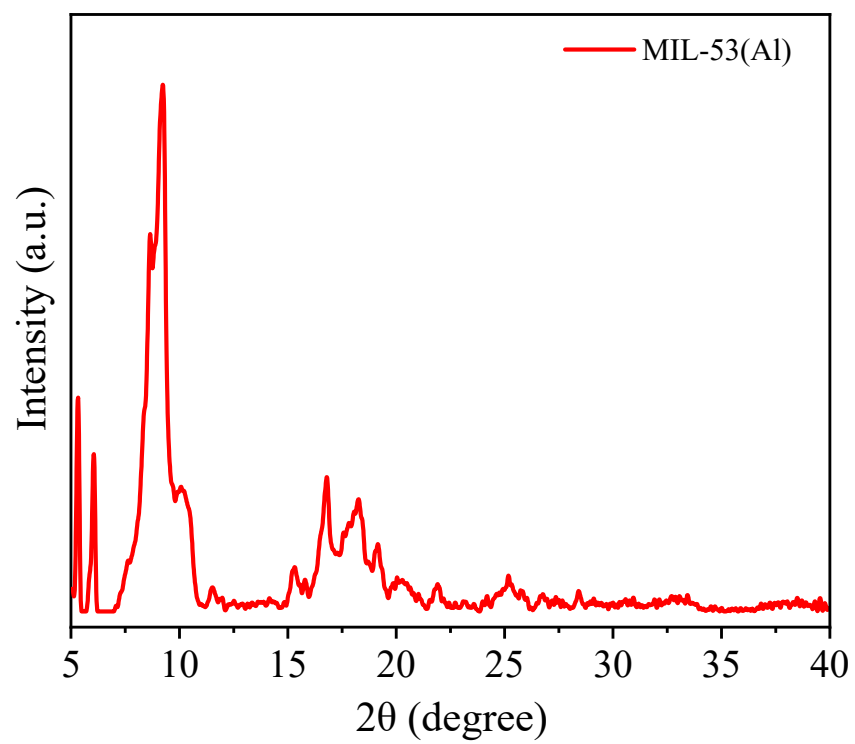

**Figure S4.** XRD pattern of MIL-53 (Al) nanoparticles

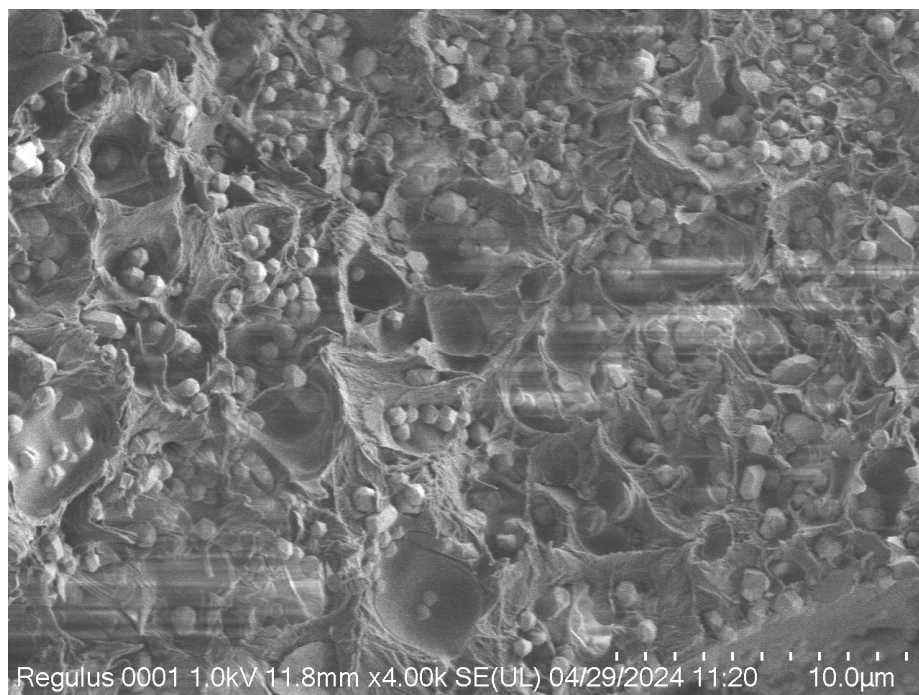

**Figure S5.** SEM image of HKUST-1@EPP after the reaction

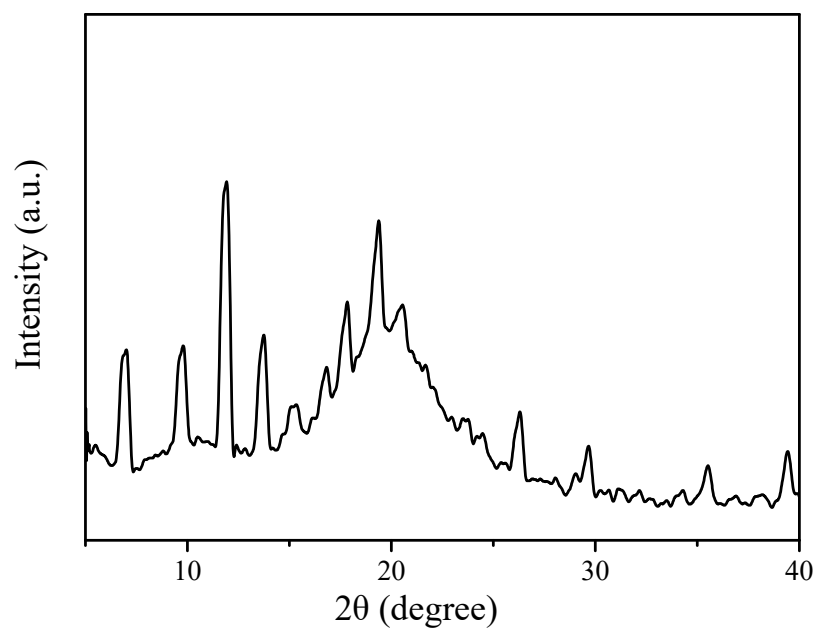

**Figure S6.** XRD pattern of HKUST-1@EPP after the reaction

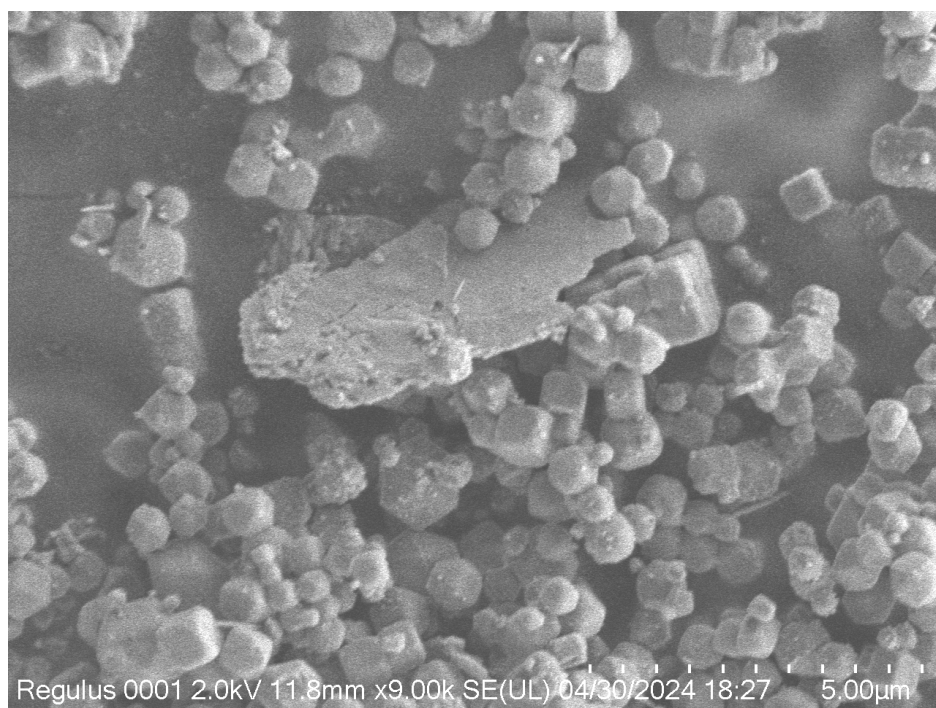

**Figure S7.** SEM image of HKUST-1 nanoparticles after the reaction
